# Supplementary material
Source: PubMed Central journal article supplement (PMC5827961)
Supplement: NIHMS943968-supplement-Supp_Figures.pdf [file NIHMS943968-supplement-Supp_Figures.pdf]

Supplemental Figure 1. Forest plot summarizing selected standardized incidence ratios and standardized mortality ratios by sex in the Barrett’s esophagus cohort relative to the greater KPNC population.

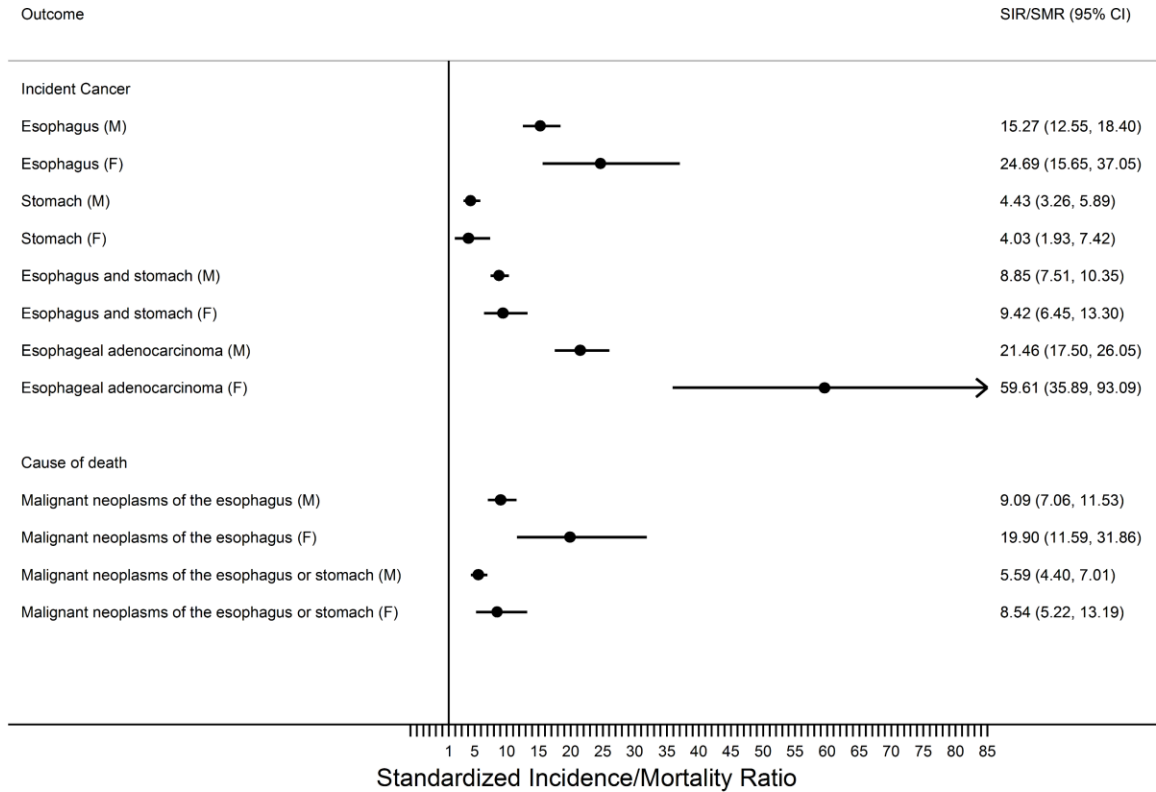

Supplemental Figure 1 Legend: The filled circles represent the risk estimates on a linear scale while the horizontal lines demarcate the extent of the 95% confidence intervals. The vertical line demarcates the null hypothesis. Abbreviations: CI, confidence interval; F, females; KPNC, Kaiser Permanente Northern California; M, males; SIR, standardized incidence ratio; SMR, standardized mortality ratio.

Supplemental Figure 2. Forest plot summarizing selected excess absolute risks by sex in the Barrett's esophagus cohort relative to the greater KPNC population.

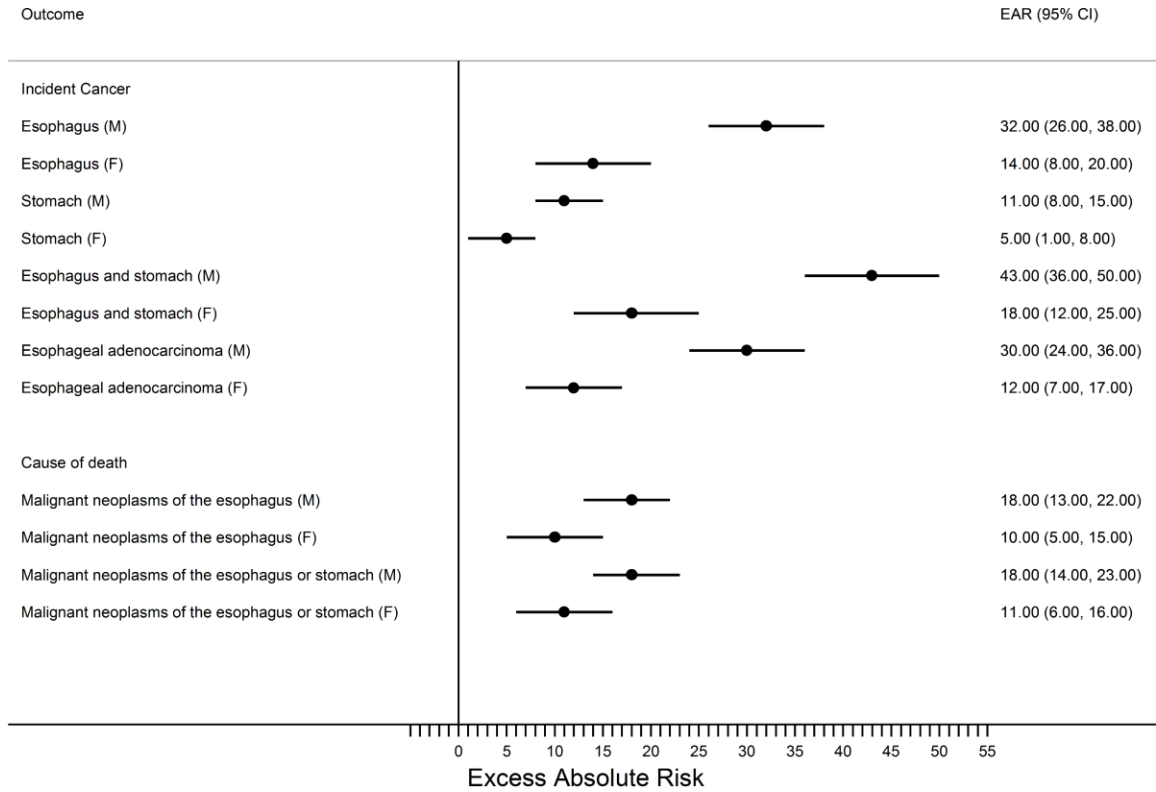

Supplemental Figure 2 Legend: The filled circles represent the risk estimates on a linear scale while the horizontal lines demarcate the extent of the 95% confidence intervals. The vertical line demarcates the null hypothesis. Abbreviations: CI, confidence interval; EAR, excess absolute risk; F, females; KPNC, Kaiser Permanente Northern California; M, males.
